# Supplementary material
Source: Springer Nature journal article supplement (https://www.springermedizin.de/resource/supplementary/12960_2003_12_MOESM9_ESM.pdf/9569728)
Supplement: MOESM9 [file 9569728]

### ***Pull factors (urban)***

Demand

- in rich countries
- in urban private hospitals

Better living standards

Specialization training

Better income

Higher social recognition

Job satisfaction/career

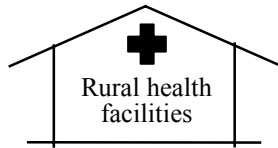

Rural health facilities

### **Push factors**

- Lower living standard
- Low social recognition/ career path
- Poor facilities/logistics
- Lower income
- Low opportunity for training

### ***Remedies***

#### **Development of rural infrastructure**

- communication
- schools
- facilities/logistics

#### **Education**

- rural recruitment/training/placement
- opportunity for continuous education
- special quotes for training
- support R&D and qualification

#### **Social**

- special award; career path
- civic movement

#### **Financial**

- hardship allowance plus other incentives
- capitation payment systems
- high tuition fees paid by rural works
- compulsory public work
